# Supplementary material for: COVID-19 Variants and Vaccine Development
Source: MDPI journal article supplement (doi:10.3390/v16050757), 2024-05-10
Supplement: s1 [file s1]

**Table S1.** The ingredients of Comirnaty and Spikevax COVID-19 vaccine.

| Ingredients       | Comirnaty (original)                                                                                                                                 | Comirnaty (updated)        | Spikevax                                                            |
|-------------------|------------------------------------------------------------------------------------------------------------------------------------------------------|----------------------------|---------------------------------------------------------------------|
| mRNA              | Nucleoside-modified mRNA encoding the S glycoprotein of SARS-CoV-2                                                                                   |                            | Nucleoside-modified mRNA encoding the S glycoprotein of SARS-CoV-2  |
| Lipid             | 2[(polyethylene glycol (PEG))-2000]-N, N-ditetradecylacetamide                                                                                       |                            | PEG2000-DMG                                                         |
|                   | 1,2-distearoyl-sn-glycero-3-phosphocholine<br>Cholesterol (plant derived)<br>((4-hydroxybutyl) azanediyl) bis(hexane-6,1-diyl) bis(2-hexyldecanoate) |                            | 1,2-distearoyl-sn-glycero-3-phosphocholine<br>BotaniChol®<br>SM-102 |
| Other Ingredients | Dibasic sodium phosphate dihydrate                                                                                                                   |                            | Sodium acetate                                                      |
|                   | Monobasic potassium phosphate                                                                                                                        | Sucrose (table sugar)      | Sucrose (basic table sugar)                                         |
|                   | Potassium chloride (common food salt)                                                                                                                | Tromethamine               | Tromethamine                                                        |
|                   | Sodium chloride (basic table salt)                                                                                                                   | Tromethamine hydrochloride | Tromethamine hydrochloride                                          |
|                   | Sucrose (basic table sugar)                                                                                                                          |                            | Acetic acid (the main ingredient in white household vinegar)        |

**Table S2.** Bivalent vaccines.

|                                                  | Developers (Name)                                    | Dose (mRNA) /Volume | Vaccine Composition                      | Effectiveness against Omicron sub-variants                                                                                                                                             |
|--------------------------------------------------|------------------------------------------------------|---------------------|------------------------------------------|----------------------------------------------------------------------------------------------------------------------------------------------------------------------------------------|
| Pfizer and BioNTech (Comirnaty) Bivalent Booster | Original/Omicron BA.1 bivalent vaccine               | 30 µg/0.3 mL        | 15 µg WT+ 15 µg Omicron BA.1 (mRNA)      | Higher neutralization activity against BA.2 and BA.5 compared with WT group<br>Decreased neutralization activity against BA.5 [193]                                                    |
|                                                  | Omicron BA.4/BA.5-adapted bivalent vaccine           | 30 µg/0.3 mL        | 15 µg WT+ 15 µg Omicron BA.4/BA.5 (mRNA) | Higher neutralizing responses against BA.5-derived sublineages (BA.4.6, BQ.1.1, and XBB.1) and BA.2-derived sublineage (BA.2.75.2) compared with the original monovalent vaccine [194] |
|                                                  | BA.1 Omicron- containing vaccine (mRNA-1273.214)     | 50 µg/0.5mL         | 25 µg WT+ 25 µg Omicron BA.1 (mRNA)      | Elicited neutralizing antibody responses against omicron that were superior to those with original monovalent vaccine [194]                                                            |
| Moderna (Spikevax) Bivalent Booster              | BA.4/BA.5 Omicron-containing vaccine (mRNA-1273.222) | 50 µg/0.5mL         | 25 µg WT+ 25 µg Omicron BA.4/BA.5 (mRNA) | Enhanced neutralizing antibody responses against omicron sublineages (BA.1, BA.2.75.2 and BA.5) compared with original monovalent vaccine [195]                                        |

193. Kawasuji, H.; Morinaga, Y.; Tani, H.; Saga, Y.; Yamada, H.; Yoshida, Y.; Takegoshi, Y.; Kaneda, M.; Murai, Y.; Kimoto, K. Efficacy of the wild-type/Omicron BA. 1 bivalent vaccine as the second booster dose against Omicron BA. 2 and BA. 5. *medRxiv* **2022**, preprint

194. Zou, J.; Kurhade, C.; Patel, S.; Kitchin, N.; Tompkins, K.; Cutler, M.; Cooper, D.; Yang, Q.; Cai, H.; Muik, A. Improved neutralization of Omicron BA. 4/5, BA. 4.6, BA. 2.75. 2, BQ. 1.1, and XBB. 1 with bivalent BA. 4/5 vaccine. *BioRxiv* **2022**, preprint.
195. Scheaffer, S.M.; Lee, D.; Whitener, B.; Ying, B.; Wu, K.; Liang, C.-Y.; Jani, H.; Martin, P.; Amato, N.J.; Avena, L.E. Bivalent SARS-CoV-2 mRNA vaccines increase breadth of neutralization and protect against the BA. 5 Omicron variant in mice. *Nature medicine* **2023**, 29, 247-257.
